# Supplementary material for: Methylation mediated by an anthocyanin, O-methyltransferase, is involved in purple flower coloration in Paeonia
Source: PubMed Central journal article supplement (PMC4623676; doi:10.1093/jxb/erv365), 2015-07-23
Supplement: supp_erv365_jexbot149625_file002.pdf [file supp_erv365_jexbot149625_file002.pdf]

# Methylation mediated by an anthocyanin *O*-methyltransferase is involved in purple flower coloration in *Paeonia*

Hui Du, Jie Wu, Kui-Xian Ji, Qing-Yin Zeng, Mohammad-Wadud Bhuiya, Shang Su,

Qing-Yan Shu, Hong-Xu Ren, Zheng-An Liu and Liang-Sheng Wang

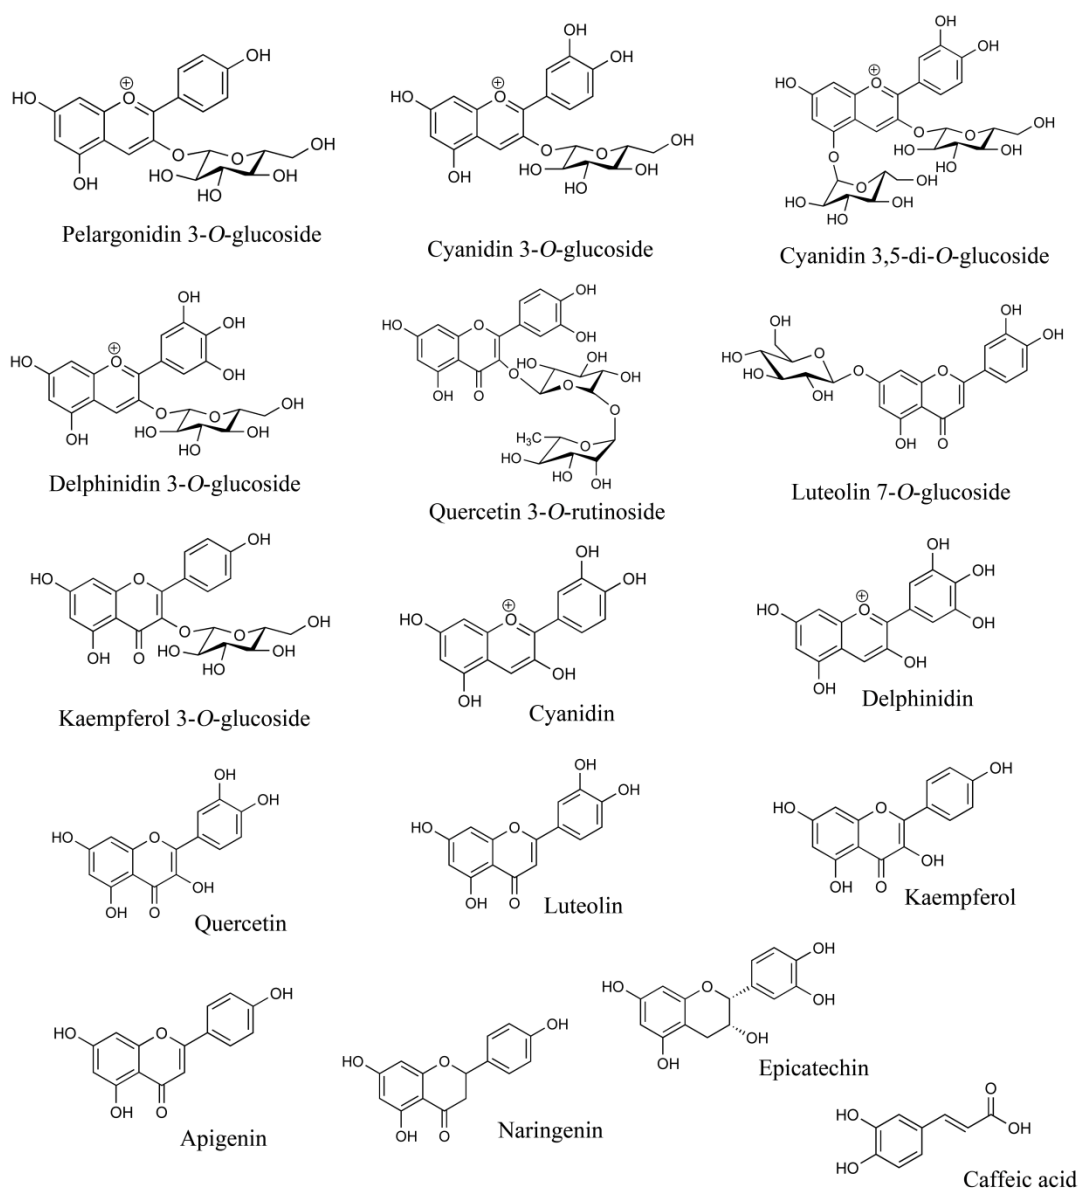

**Figure S1.** The chemical structure of substrates used for *in vitro* analysis of recombinant PsAOMT and PtAOMT.

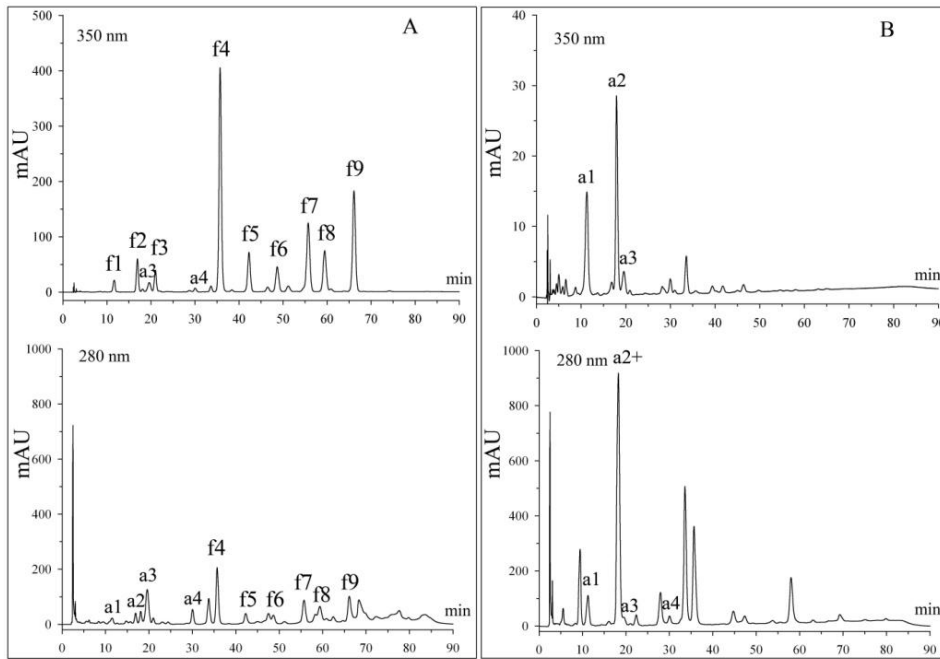

**Figure S2.** HPLC profiles of flower extracts from *Paeonia suffruticosa* cv. 'Gunpohden' (A) and *Paeonia tenuifolia* (B) at 350 nm and 280 nm. a1, Cy3G5G; a2, Cy3G; a3, Pn3G5G; a4, Pn3G; f1, Qu3G7G; f2, Km3G7G; f3, Is3G7G; f4, Lu7G; f5, Lu7Neo; f6, Ap7G; f7, Ap7Neo; f8, Ch7G; and f9, Ch7Neo. The unlabeled peaks are unknown peaks. Peak a2+ was a mixture that included a2 and an unknown compound.

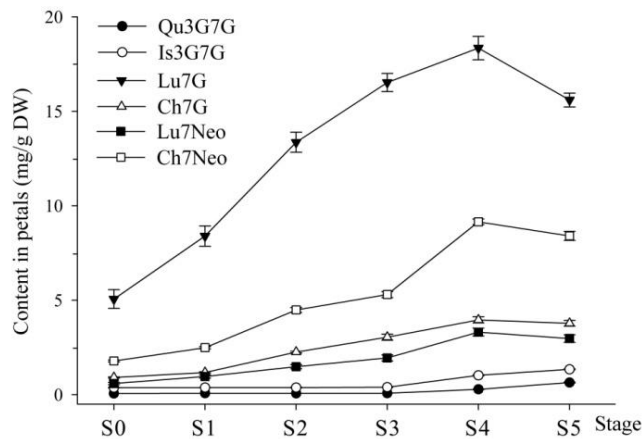

**Figure S3.** The accumulation of colorless flavonoids in *Paeonia suffruticosa* cv. 'Gunpohden' petals during flower development.

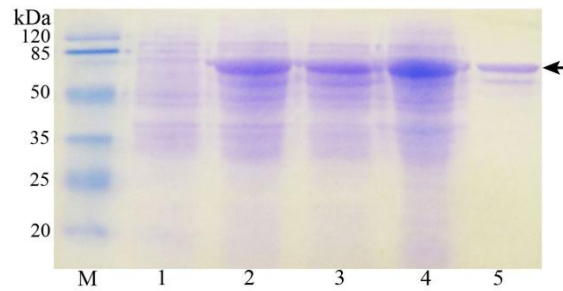

**Figure S4.** SDS-PAGE of recombinant PsAOMT. Lane M, protein size markers; Lanes 1–2, total *E. coli* protein before or after induction; Lanes 3–4, fragmented *E. coli* supernatant and pellet after induction with fusion protein; and Lane 5, purified MBP-PsAOMT fusion protein.

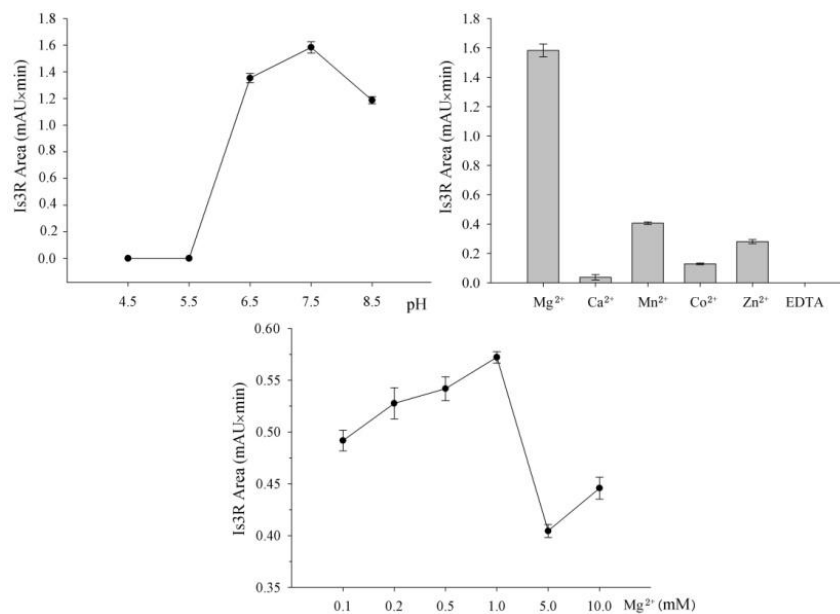

**Figure S5.** The catalytic activity of PsAOMT with quercetin 3-*O*-rutinoside (Qu3R) as a substrate under different reaction conditions, including a pH gradient of buffer solutions, the presence of different divalent cations, and various Mg<sup>2+</sup> concentrations. The mAU areas of the methylated product and isorhamnetin 3-*O*-rutinoside (Is3R) are presented as the means of triplicate experiments.

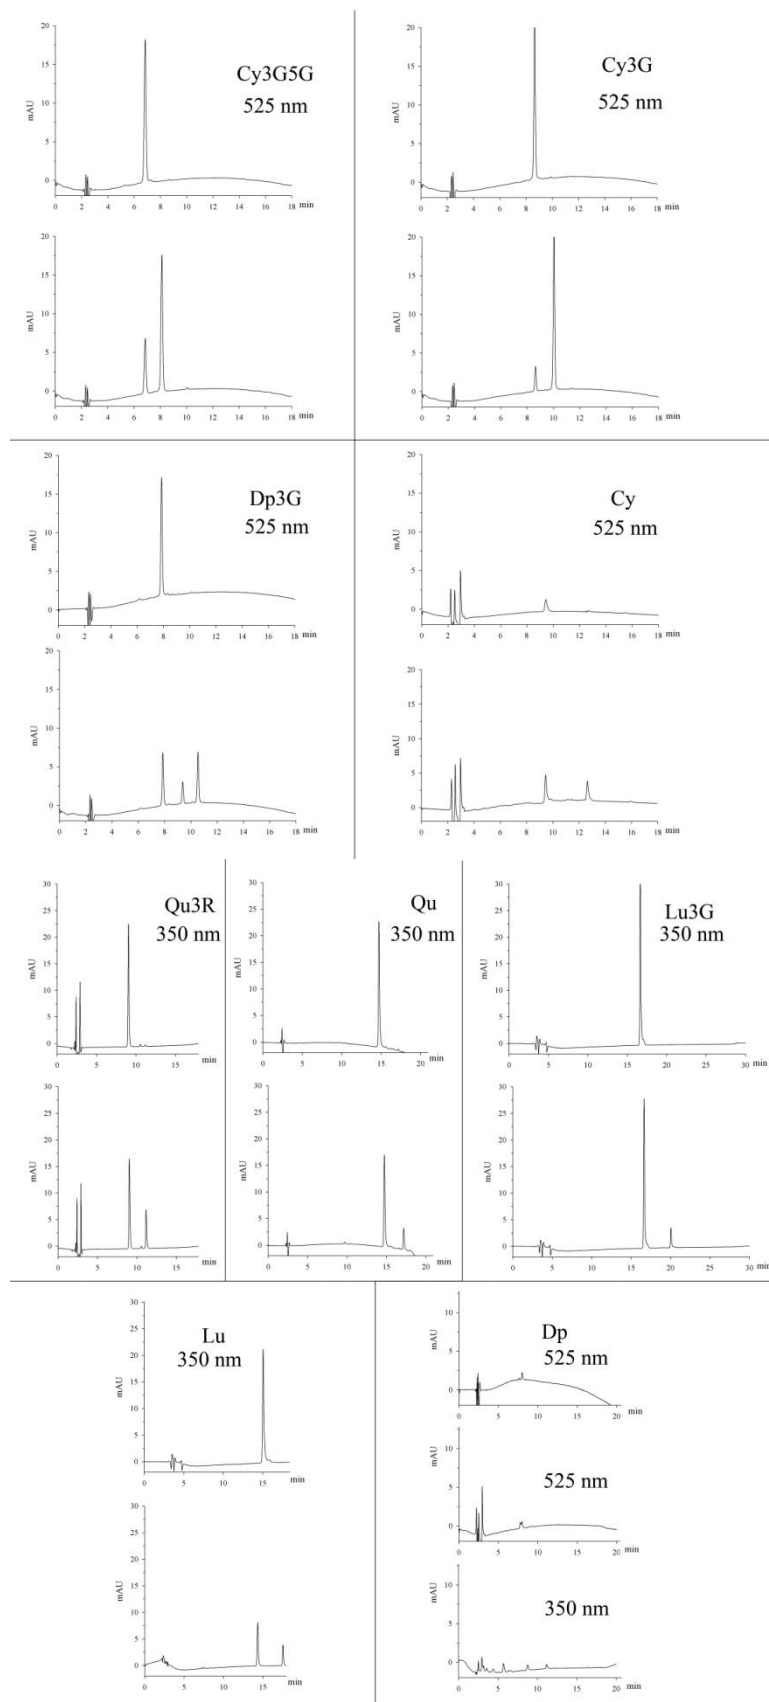

**Figure S6.** Profiles of products methylated by recombinant PsAOMT using a series of substrates in the *in vitro* system by HPLC analysis.

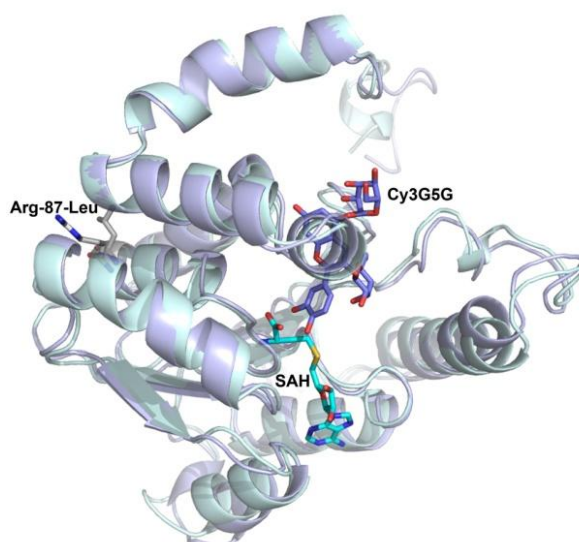

**Figure S7.** Superimposed 3D-models of PsAOMT and PtAOMT are represented as cartoons; PsAOMT and PtAOMT are labeled in light blue and pale cyan, respectively. SAH, cyanidin 3,5-di-*O*-glucoside (Cy3G5G), and the key amino acid residue Arg-87-Leu are represented as sticks and labeled in cyan, slate and white, respectively. The oxygen, nitrogen, and sulfur atoms are labeled, in red, blue, and yellow, respectively.

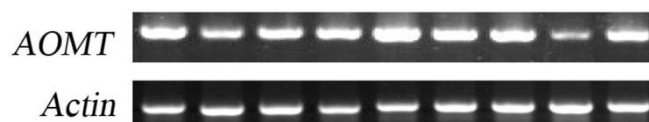

**Figure S8.** The expression of *AOMTs* in transgenic tobacco lines according to RT-PCR. Lanes 1–5, transgenic lines with 35S::*PsAOMT*; Lanes 6–9, transgenic lines with 35S::*PtAOMT*. The expression of *Actin* (GQ339768) was used as standard.

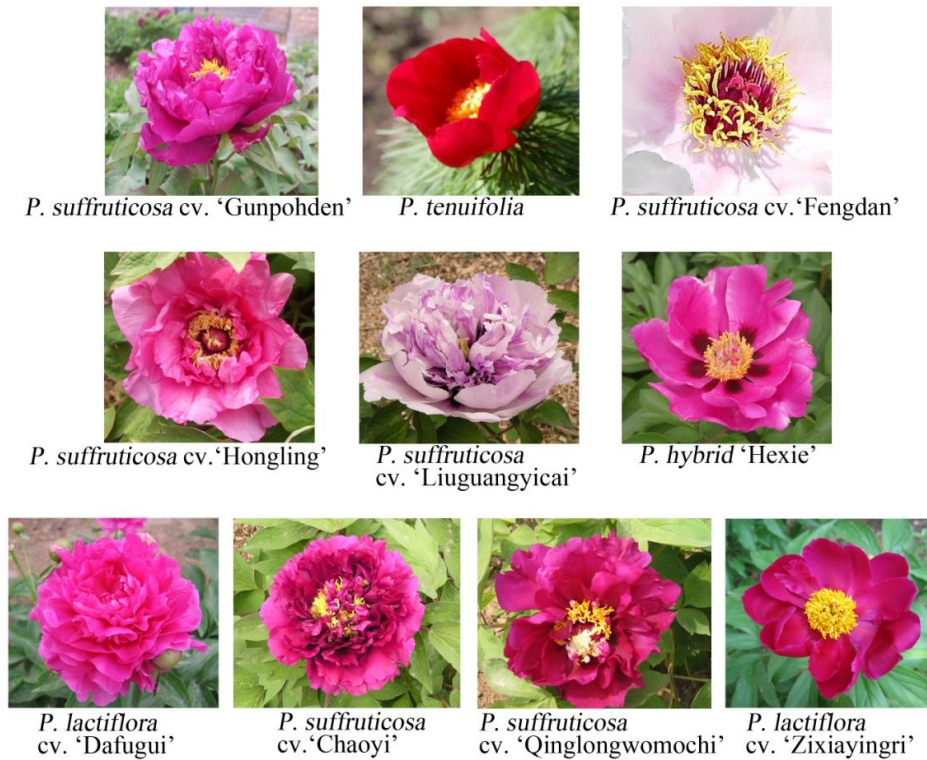

**Figure S9.** Flower phenotypes of different *Paeonia* cultivars used in this study.

|                                              |                                                                   |     |
|----------------------------------------------|-------------------------------------------------------------------|-----|
| <i>P. suffruticosa</i> 'Qunfangdian'         | MAESRRKGI LKSEALLKY I LETSVYPREHEQLKQLRQATVDKYYKWSVMNVPADEGQFLS   | 60  |
| <i>P. tenuifolia</i>                         | MAESRRKGI LKSEALLKY I LETSVYPREHEQLKQLRQATVDKYYKWSVMNVPADEGQFLS   | 60  |
| <i>P. suffruticosa</i> 'Fengdan'             | MAESRRKGI LKSEALLKY I LETSVYPREHEQLKQLRQATVDKYYKWSVMNVPADEGQFLS   | 60  |
| <i>P. suffruticosa</i> 'Hongling'            | MAESRRKGI LKSEALLKY I LETSVYPREHEQLKQLRQATVDKYYKWSVMNVPADEGQFLS   | 60  |
| <i>P. suffruticosa</i> 'Liuguangyicai'       | MAESRRKGI LKSEALLKY I LETSVYPREHEQLKQLRQATVDKYYKWSVMNVPADEGQFLS   | 60  |
| <i>P. hybrid</i> 'Hexie'                     | MAESRRKGI LKSEALLKY I LETSVYPREHEQLKQLRQATVDKYYKWSVMNVPADEGQFLS   | 60  |
| <i>P. lactiflora</i> 'Dafugui'               | MAESRRKGI LKSEALLKY I LETSVYPREHEQLKQLRQATVDKYYKWSVMNVPADEGQFLS   | 60  |
| <i>P. suffruticosa</i> cv. 'Chaoyi'          | MAESRRKGI LKSEALLKY I LETSVYPREHEQLKQLRQATVDKYYKWSVMNVPADEGQFLS   | 60  |
| <i>P. suffruticosa</i> cv. 'Qinglongwomochi' | MAESRRKGI LKSEALLKY I LETSVYPREHEQLKQLRQATVDKYYKWSVMNVPADEGQFLS   | 60  |
| <i>P. lactiflora</i> cv. 'Zixiayingri'       | MAESRRKGI LKSEALLKY I LETSVYPREHEQLKQLRQATVDKYYKWSVMNVPADEGQFLS   | 60  |
| <i>P. suffruticosa</i> 'Qunfangdian'         | MLLKIMNAKKT I EVGVFTGYSLLTADALP TDAKITA IDPDG BAYETGLPF IKKAGVEHK | 120 |
| <i>P. tenuifolia</i>                         | MLLKIMNAKKT I EVGVFTGYSLLTADALP TDAKITA IDPDG BAYETGLPF IKKAGVEHK | 120 |
| <i>P. suffruticosa</i> 'Fengdan'             | MLLKIMNAKKT I EVGVFTGYSLLTADALP TDAKITA IDPDG BAYETGLPF IKKAGVEHK | 120 |
| <i>P. suffruticosa</i> 'Hongling'            | MLLKIMNAKKT I EVGVFTGYSLLTADALP TDAKITA IDPDG BAYETGLPF IKKAGVEHK | 120 |
| <i>P. suffruticosa</i> 'Liuguangyicai'       | MLLKIMNAKKT I EVGVFTGYSLLTADALP TDAKITA IDPDG BAYETGLPF IKKAGVEHK | 120 |
| <i>P. hybrid</i> 'Hexie'                     | MLLKIMNAKKT I EVGVFTGYSLLTADALP TDAKITA IDPDG BAYETGLPF IKKAGVEHK | 120 |
| <i>P. lactiflora</i> 'Dafugui'               | MLLKIMNAKKT I EVGVFTGYSLLTADALP TDAKITA IDPDG BAYETGLPF IKKAGVEHK | 120 |
| <i>P. suffruticosa</i> cv. 'Chaoyi'          | MLLKIMNAKKT I EVGVFTGYSLLTADALP TDAKITA IDPDG BAYETGLPF IKKAGVEHK | 120 |
| <i>P. suffruticosa</i> cv. 'Qinglongwomochi' | MLLKIMNAKKT I EVGVFTGYSLLTADALP TDAKITA IDPDG BAYETGLPF IKKAGVEHK | 120 |
| <i>P. lactiflora</i> cv. 'Zixiayingri'       | MLLKIMNAKKT I EVGVFTGYSLLTADALP TDAKITA IDPDG BAYETGLPF IKKAGVEHK | 120 |
| <i>P. suffruticosa</i> 'Qunfangdian'         | INVIQADAMSVLDDLVNTNGKEEGSFDFAFVDADKENYAKYHEPLMKLVKIGGI IGYDNTL    | 180 |
| <i>P. tenuifolia</i>                         | INVIQADAMSVLDDLVNTNGKEEGSFDFAFVDADKENYAKYHEPLMKLVKIGGI IGYDNTL    | 180 |
| <i>P. suffruticosa</i> 'Fengdan'             | INVIQADAMSVLDDLVNTNGKEEGSFDFAFVDADKENYAKYHEPLMKLVKIGGI IGYDNTL    | 180 |
| <i>P. suffruticosa</i> 'Hongling'            | INVIQADAMSVLDDLVNTNGKEEGSFDFAFVDADKENYAKYHEPLMKLVKIGGI IGYDNTL    | 180 |
| <i>P. suffruticosa</i> 'Liuguangyicai'       | INVIQADAMSVLDDLVNTNGKEEGSFDFAFVDADKENYAKYHEPLMKLVKIGGI IGYDNTL    | 180 |
| <i>P. hybrid</i> 'Hexie'                     | INVIQADAMSVLDDLVNTNGKEEGSFDFAFVDADKENYAKYHEPLMKLVKIGGI IGYDNTL    | 180 |
| <i>P. lactiflora</i> 'Dafugui'               | INVIQADAMSVLDDLVNTNGKEEGSFDFAFVDADKENYAKYHEPLMKLVKIGGI IGYDNTL    | 180 |
| <i>P. suffruticosa</i> cv. 'Chaoyi'          | INVIQADAMSVLDDLVNTNGKEEGSFDFAFVDADKENYAKYHEPLMKLVKIGGI IGYDNTL    | 180 |
| <i>P. suffruticosa</i> cv. 'Qinglongwomochi' | INVIQADAMSVLDDLVNTNGKEEGSFDFAFVDADKENYAKYHEPLMKLVKIGGI IGYDNTL    | 180 |
| <i>P. lactiflora</i> cv. 'Zixiayingri'       | INVIQADAMSVLDDLVNTNGKEEGSFDFAFVDADKENYAKYHEPLMKLVKIGGI IGYDNTL    | 180 |
| <i>P. suffruticosa</i> 'Qunfangdian'         | WFGSVALSDEDEMKEFQEKGRRIE EFNFTFLAADPRI ELAHSI GDGLALCRRLY         | 235 |
| <i>P. tenuifolia</i>                         | WFGSVALSDEDEMKEFQEKGRRIE EFNFTFLAADPRI ELAHSI GDGLALCRRLY         | 235 |
| <i>P. suffruticosa</i> 'Fengdan'             | WFGSVALSDEDEMKEFQEKGRRIE EFNFTFLAADPRI ELAHSI GDGLALCRRLY         | 235 |
| <i>P. suffruticosa</i> 'Hongling'            | WFGSVALSDEDEMKEFQEKGRRIE EFNFTFLAADPRI ELAHSI GDGLALCRRLY         | 235 |
| <i>P. suffruticosa</i> 'Liuguangyicai'       | WFGSVALSDEDEMKEFQEKGRRIE EFNFTFLAADPRI ELAHSI GDGLALCRRLY         | 235 |
| <i>P. hybrid</i> 'Hexie'                     | WFGSVALSDEDEMKEFQEKGRRIE EFNFTFLAADPRI ELAHSI GDGLALCRRLY         | 235 |
| <i>P. lactiflora</i> 'Dafugui'               | WFGSVALSDEDEMKEFQEKGRRIE EFNFTFLAADPRI ELAHSI GDGLALCRRLY         | 235 |
| <i>P. suffruticosa</i> cv. 'Chaoyi'          | WFGSVALSDEDEMKEFQEKGRRIE EFNFTFLAADPRI ELAHSI GDGLALCRRLY         | 235 |
| <i>P. suffruticosa</i> cv. 'Qinglongwomochi' | WFGSVALSDEDEMKEFQEKGRRIE EFNFTFLAADPRI ELAHSI GDGLALCRRLY         | 235 |
| <i>P. lactiflora</i> cv. 'Zixiayingri'       | WFGSVALSDEDEMKEFQEKGRRIE EFNFTFLAADPRI ELAHSI GDGLALCRRLY         | 235 |

**Figure S10.** Amino acid sequence alignments of the AOMTs from ten *Paeonia* plants.

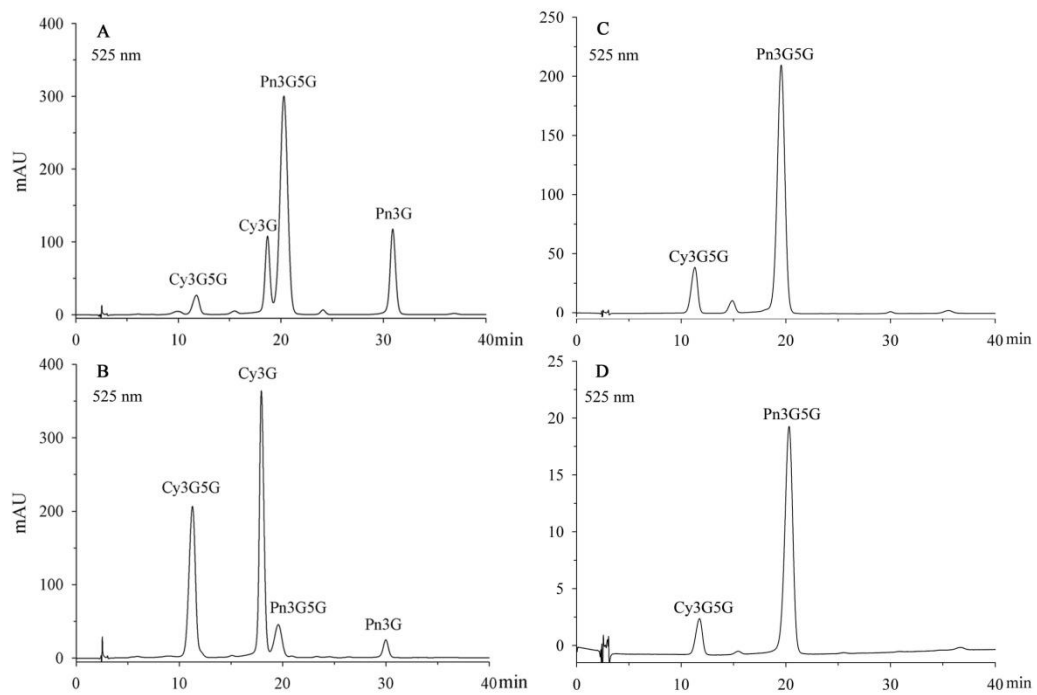

**Figure S11.** HPLC profiles of anthocyanins in flower petals. A, *Paeonia suffruticosa* cv. 'Gunpohden'; B, *Paeonia tenuifolia*; C, *Paeonia hybrid* ('Hexie'); D, *Paeonia lactiflora* cv. 'Dafugui.'

**Table S1** The primer sequences used in site-directed mutagenesis and qPCR.

| Primer Name                          | Oligonucleotide sequence   |
|--------------------------------------|----------------------------|
| AOMT-forward                         | ATGGCCGAGTCAGATAGGAAGGGT   |
| AOMT-reverse                         | TAAAATGATCCTTCTGCCATGCT    |
| PtAOMT-G13E-forward                  | TATTCTTAAAAGTGAAGCCCTTTTG  |
| PtAOMT-G13E-reverse                  | TCACTTTTAAGAATACCCTTCCTAT  |
| PtAOMT-T85A-forward                  | TTATTCTCTTCTCACTGCCGCTCGT  |
| PtAOMT-T85A-reverse                  | CAGTGAGAAGAGAATAACCAGTAAAG |
| PtAOMT-R87L-forward                  | TCACTACCGCTCTTGCTCTGCCTAC  |
| PtAOMT-R87L-reverse                  | AGAGCGGTAGTGAGAAGAGAATAAC  |
| PtAOMT-T205R-forward                 | GGCGCATCTTTAGAGAGTTCAACAC  |
| PtAOMT-T205R-reverse                 | CTAAAGATGCGCCTGCCCTTTTCCTG |
| PsAOMT-L87R-forward                  | CTTCTCACTGCCGCTCGTGCTCTGC  |
| PsAOMT-L87R-reverse                  | CGAGCGGCAGTGAGAAGAGAATAACC |
| PsAOMT-L87A-forward                  | TCTCACTGCCGCTGCTGCTCTGCCT  |
| PsAOMT-L87A-reverse                  | GCAGCGGCAGTGAGAAGAGAATAACC |
| AOMT-qPCR-forward                    | TAAGAAGGCTGGAGTGGAGCATAAG  |
| AOMT-qPCR-reverse                    | GGCATAGTTTTCTTGTCAGCATCC   |
| Actin-forward (For <i>Paeonia</i> )  | GCAGTGTTCCCCAGTATT         |
| Actin-reverse (For <i>Paeonia</i> )  | TCTTTTCCATGTCATCCC         |
| Actin-forward (For transgenic lines) | GCCAACAGAGAGAAAATGACCC     |
| Actin-reverse (For transgenic lines) | TCATGGATGGCTGGAAGAGGACTTC  |



**Table S2** A summary of ten specimens, including information regarding the flower color, chromatic parameters, total anthocyanin content, methylation levels of the anthocyanins, and the key amino acid(s) of the AOMTs.

|                                    | <i>Paeonia<br/>suffruticosa</i><br>cv.<br>'Gunpohden' | <i>P.<br/>tenuifolia</i> | <i>P.<br/>suffruticosa</i><br>cv.<br>'Fengdan'<br>(flower disc) | <i>P.<br/>suffruticosa</i><br>cv.<br>'Hongling' | <i>P.<br/>suffruticosa</i><br>cv.<br>'Liuguangyi<br>cai' | <i>P. hybrid</i><br>'Hexie' | <i>P.<br/>lactiflora</i><br>cv.<br>'Dafugui' | <i>P.<br/>suffruticosa</i><br>cv.<br>'Chaoyi' | <i>P.<br/>suffruticosa</i><br>cv.<br>'Qinglongwo<br>mochi | <i>P. lactiflora</i><br>cv.<br>'Zixiayingri' |
|------------------------------------|-------------------------------------------------------|--------------------------|-----------------------------------------------------------------|-------------------------------------------------|----------------------------------------------------------|-----------------------------|----------------------------------------------|-----------------------------------------------|-----------------------------------------------------------|----------------------------------------------|
| Flower color                       | purple-red                                            | vivid red                | purple-red                                                      | purple-red                                      | Purple-red                                               | Purple-red                  | Purple-red                                   | purple-red                                    | purple-red                                                | red-purple                                   |
| RHSCC                              | 77B                                                   | 61A                      | —                                                               | 61C                                             | 82C                                                      | 72B                         | 71D                                          | 71B                                           | 71A                                                       | 61A                                          |
| <i>L</i> *                         | 35.5                                                  | 31.5                     | 75.9                                                            | 51.9                                            | 75.8                                                     | 35.3                        | 46.1                                         | 33.94                                         | 25.26                                                     | 22.47                                        |
| <i>a</i> *                         | 36.2                                                  | 41.5                     | -7.4                                                            | 40.7                                            | -0.7                                                     | 47.1                        | 45.2                                         | 47.35                                         | 33.51                                                     | 34.37                                        |
| <i>b</i> *                         | -16.0                                                 | 9.4                      | 5.6                                                             | -7.2                                            | 5.6                                                      | -17.0                       | -13.1                                        | -10.60                                        | -4.15                                                     | 0.64                                         |
| <i>C</i> *                         | 39.7                                                  | 42.6                     | 9.3                                                             | 41.4                                            | 5.8                                                      | 50.2                        | 47.2                                         | 48.55                                         | 33.85                                                     | 34.37                                        |
| Hue                                | -23.9                                                 | -12.9                    | -10.2                                                           | -10.15                                          | -15.05                                                   | -20.2                       | -16.5                                        | -12.59                                        | -6.86                                                     | 1.07                                         |
| Total<br>anthocyanins<br>(mg/g DW) | 10.73                                                 | 13.25                    | 2.32                                                            | 13.05                                           | 2.54                                                     | 7.64                        | 4. 86                                        | 27.62                                         | 45.25                                                     | 15.93                                        |
| TF                                 | 32.70                                                 | 0.72                     | —                                                               | 42.28                                           | 33.1                                                     | 38.23                       | 23.37                                        | 24.18                                         | 41.71                                                     | 23.55                                        |
| CI                                 | 3.05                                                  | 0.05                     | —                                                               | 3.24                                            | 13.06                                                    | 5.28                        | 4.81                                         | 0.88                                          | 0.92                                                      | 1.48                                         |
| Methylation%                       | 94                                                    | 24                       | 95                                                              | 91                                              | 86                                                       | 87                          | 89                                           | 55                                            | 67                                                        | 68                                           |
| Amino acid at<br>87 position       | Leucine                                               | Arginine                 | Leucine                                                         | Leucine                                         | Leucine                                                  | Leucine                     | Leucine                                      | Leucine                                       | Leucine                                                   | Leucine                                      |

The data of chroma parameters (RHSCC, *L*\*, *a*\*, *b*\*, *C*\* and hue), TA, TF and CI were cited from Li CH (2010, The flavonoid composition in tree peony petals and their effects on the coloration, PhD dissertation) and Jia N (2008, Studies on petal coloration mechanism and chemotaxonomy of herbaceous peony, Master dissertation).

**Table S3** Identification of products methylated by recombinant PsAOMT using a series of substrates in the *in vitro* system.

| Substrate ( $\mu\text{M}$ ) and reaction duration (min) | Wavelength nm | Retention time min | $m/z$ positive mode                                                     | $m/z$ negative mode                                   | Identification                          |
|---------------------------------------------------------|---------------|--------------------|-------------------------------------------------------------------------|-------------------------------------------------------|-----------------------------------------|
| Cy3G5G 25 $\mu\text{M}$ -10 min                         | 525           | 4.9                | 287.1(3.59),449.1(8.97),<br>611.1(100)                                  |                                                       | Cyanidin<br>3,5-di- <i>O</i> -glucoside |
|                                                         |               | 6.2                | 301.0(3.39), 625.1(100)                                                 |                                                       | Peonidin<br>3,5-di- <i>O</i> -glucoside |
| Cy3G 25 $\mu\text{M}$ -10 min                           | 525           | 6.4                | 287.0(69.94), 449.1(54.29)                                              |                                                       | Cyanidin 3- <i>O</i> -glucoside         |
|                                                         |               | 7.8                | 301.1(98.70), 463.1(100)                                                |                                                       | Peonidin 3- <i>O</i> -glucoside         |
| Dp3G 25 $\mu\text{M}$ -10 min                           | 525           | 6.1                | 303.1(100), 465.1(75.44)                                                |                                                       | Delphinidin 3- <i>O</i> -glucoside      |
|                                                         |               | 7.6                | 317.0(98.05), 479.1(100)                                                |                                                       | Petunidin 3- <i>O</i> -glucoside        |
|                                                         |               | 8.9                | 331(74.91), 493.1(100)                                                  |                                                       | Malvidin 3- <i>O</i> -glucoside         |
| Qu3R 25 $\mu\text{M}$ -10 min                           | 350           | 9.8                | 303.0(100), 465.1(35.01),<br>611.1(28.62)                               |                                                       | Quercetin 3- <i>O</i> -rutinoside       |
|                                                         |               | 11.9               | 317.1(100), 479.0(30.55),<br>625.1(22.67)                               |                                                       | Isorhamnetin 3-rutinoside               |
| Qu 25 $\mu\text{M}$ -10 min                             | 350           | 14.6               | 303.0(100)                                                              | 300.9(100)                                            | Quercetin                               |
|                                                         |               | 18.1               | 149.0(100), 317.1(33.64)                                                | 311.0(100)                                            | Isorhamnetin                            |
| Lu7G 25 $\mu\text{M}$ -10 min                           | 350           | 10.2               | 287.0(100), 449.1(49.36)                                                |                                                       | Luteolin 7- <i>O</i> -glucoside         |
|                                                         |               | 12.4               | 301.1(100), 463.1(46.08)                                                |                                                       | Chrysoderol 7- <i>O</i> -glucoside      |
| Lu 25 $\mu\text{M}$ -10 min                             | 350           | 15.1               | 287.0(100)                                                              |                                                       | Luteolin                                |
|                                                         |               | 18.2               | 301.0(100)                                                              |                                                       | Chrysoderol                             |
| Cy 50 $\mu\text{M}$ -10 min                             | 525           | 11.4               | 287.0(100)                                                              |                                                       | Cyanidin                                |
|                                                         |               |                    | 301.2(31.10), 287.0(20.42),<br>276.0(72.62), 149.0(100)                 |                                                       | Peonidin                                |
| Dp 50 $\mu\text{M}$ -10 min                             | 350           | 8.1                | 393.0(100),149.0(79.49),<br>132.0(75.05), 471.8(23.54)                  | 468.9(100),<br>409.0(26.44),376.9(22.32),276.8(14.04) | Unknown                                 |
|                                                         |               | 11.4               | 132.0(100), 276.1(85.16),<br>395.0(76.54), 471.9(52.31)                 | 392.8(84.76), 468.8(100)                              | Unknown                                 |
|                                                         |               | 13.8               | 132.0(100),149.0(81.39),<br>276.0(37.42), 309.7(89.57),<br>319.0(42.72) | 297.0(100), 316.9(99.49)                              | Unknown                                 |

**Table S4** PtAOMT-R87L activities with major substrates under optimized assay conditions.

| Substrates                           | PtAOMT-R87L      |                          |                                      |                                  |                                     |
|--------------------------------------|------------------|--------------------------|--------------------------------------|----------------------------------|-------------------------------------|
|                                      | $K_m$<br>$\mu M$ | $V_{max}$<br>$nM s^{-1}$ | $K_{cat} \times 10^{-3}$<br>$s^{-1}$ | $K_{cat}/K_m$<br>$M^{-1} s^{-1}$ | Specific Activity<br>$pkat mg^{-1}$ |
| Cyanidin 3,5-di- <i>O</i> -glucoside | 8.51 (1.39)      | 14.94 (0.73)             | 106.71 (5.21)                        | 13010 (1428)                     | 1494 (73)                           |
| Cyanidin 3- <i>O</i> -glucoside      | 3.53 (0.31)      | 17.59 (0.30)             | 125.66 (2.16)                        | 36058 (3045)                     | 1759 (30)                           |
| Delphinidin 3- <i>O</i> -glucoside   | 27.27 (1.49)     | 19.06 (0.88)             | 0.14 (0.01)                          | 4999 (82)                        | 1906 (88)                           |
| Quercetin 3- <i>O</i> -rutinoside    | 8.09 (0.25)      | 9.31 (0.97)              | 0.07 (0.01)                          | 8253 (923)                       | 931 (97)                            |
| Luteolin 7- <i>O</i> -glucoside      | 48.88 (2.74)     | 1.26 (0.24)              | 0.01 (0.00)                          | 189 (47)                         | 126 (24)                            |

Data are expressed as means ( $\pm$ SE) of triplicate assays.

**Table S5** Anthocyanins in strawberry fruits as detected by HPLC-MS (demonstrated in Figure 6).

| Peak No. | Compound                       | Peak No. | Compound                         |
|----------|--------------------------------|----------|----------------------------------|
| a1       | Pg 3,5-di- <i>O</i> -glucoside | a4       | Cy 3- <i>O</i> -malonylglucoside |
| a2       | Pg 3- <i>O</i> -glucoside      | a5       | Pg 3- <i>O</i> -malonylglucoside |
| a3       | Pg 3- <i>O</i> -rutinoside     | a6       | Pn 3- <i>O</i> -malonylglucoside |
